# Supplementary material for: SARS-CoV-2 Infection in Pregnancy: Placental Histomorphological Patterns, Disease Severity and Perinatal Outcomes
Source: MDPI journal article supplement (doi:10.3390/ijerph19159517), 2022-08-03
Supplement: s1 [file s1]

**Supplementary Table S1.** Clinical spectrum of SARS-CoV-2 infection.

| <b>Clinical Spectrum of COVID-19</b> | <b>Diagnostic Criteria</b>                                                                                                                                                                                                                                                                                         |
|--------------------------------------|--------------------------------------------------------------------------------------------------------------------------------------------------------------------------------------------------------------------------------------------------------------------------------------------------------------------|
| Asymptomatic                         | Individuals who are tested positive for SARS-CoV-2 using a virologic test (including nuclei acid amplification test or an antigen test) but lacking symptoms that of COVID-19                                                                                                                                      |
| Mild illness                         | Individuals who have some symptoms and signs of COVID-19 (such as fever, cough, sore throat, malaise, nausea, vomiting, headache, muscle pain, diarrhoea, loss of taste and smell) but without clinical or radiological evidence of viral pneumonia.                                                               |
| Moderate illness                     | Individuals who have clinical or radiological signs of lower respiratory disease (such as fever, cough, shortness of breath, and dyspnoea) and with oxygen saturation (SpO <sub>2</sub> ) ≥ 94% on room air at sea level.                                                                                          |
| Severe illness                       | Individuals who have clinical or radiological signs of lower respiratory disease (such as fever, cough, shortness of breath, and dyspnoea) plus one of the following: a respiratory rate >30 breaths/min, severe respiratory distress or SpO <sub>2</sub> < 94% on room air at sea level or lung infiltrates >50%. |
| Critical illness                     | Individuals who have respiratory failure, septic shock and/or multiple organ dysfunction.                                                                                                                                                                                                                          |

**Supplementary Table S2.** Histological features of placentas delivered from symptomatic vs asymptomatic COVID-19-infected cases.

| Histological features          |                                                              | Cases                      |                           | <i>p</i> value |
|--------------------------------|--------------------------------------------------------------|----------------------------|---------------------------|----------------|
|                                |                                                              | Asymptomatic<br>n = 19 (%) | Symptomatic<br>n = 28 (%) |                |
| Maternal vascular malperfusion | Accelerated villous maturation/<br>distal villous hypoplasia | 1                          | 6                         | 0.215          |
|                                | Syncytial knots (mean $\pm$ SD)                              | 33.56 $\pm$ 13.81          | 34.56 $\pm$ 11.87         | 0.479          |
|                                | Villous infarction                                           | 3                          | 3                         | 0.674          |
|                                | Decidual vasculopathy                                        | 8                          | 14                        | 0.767          |
|                                | Decidual arterial thrombosis                                 | 6                          | 3                         | 0.129          |
|                                |                                                              |                            |                           |                |
| Fetal vascular malperfusion    | Avascular villi                                              | 0                          | 3                         | 0.262          |
|                                | Fetal vascular thrombosis                                    | 0                          | 3                         | 0.262          |
|                                | Chorangiosis                                                 | 5                          | 2                         | 0.102          |
| Chronic inflammation           | Chronic deciduitis                                           | 1                          | 4                         | 0.396          |
|                                | Chronic villitis, low grade                                  | 1                          | 4                         | 0.264          |
|                                | Chronic villitis, high grade                                 | 1                          | 5                         |                |
|                                | Chronic histiocytic intervillitis                            | 2                          | 8                         | 0.168          |
| Maternal inflammatory response | Acute subchorionitis                                         | 8                          | 13                        | 1.000          |
|                                | Acute chorioamnionitis                                       | 1                          | 1                         |                |
| Fetal inflammatory response    | Chorionic vasculitis &/ umbilical<br>phlebitis               | 1                          | 2                         | 1.000          |
| Others                         | Oedematous villi                                             | 1                          | 4                         | 0.635          |

**Supplementary Table S3.** Logistic regression analysis of risk factors for adverse maternal and neonatal outcomes in COVID-19-infected pregnancies.

| Factors                               |                              | Adverse Maternal and Neonatal Outcomes |                        |                |                       |                |                       |                |                       |                |                         |                |
|---------------------------------------|------------------------------|----------------------------------------|------------------------|----------------|-----------------------|----------------|-----------------------|----------------|-----------------------|----------------|-------------------------|----------------|
|                                       |                              | Preterm delivery                       |                        |                | Neonatal death        |                | Poor Apgar scores     |                | SGA                   |                | Maternal death          |                |
|                                       |                              | Total cases                            | Crude OR (95% CI)      | <i>p</i> value | Crude OR (95% CI)     | <i>p</i> value | Crude OR (95% CI)     | <i>p</i> value | Crude OR (95% CI)     | <i>p</i> value | Crude OR (95% CI)       | <i>p</i> value |
| Clinical Characteristics              |                              |                                        |                        |                |                       |                |                       |                |                       |                |                         |                |
| Mother's age                          |                              | 47                                     | 1.020 (0.895, 1.162)   | 0.768          | 1.151 (0.896, 1.477)  | 0.271          | 1.124 (0.943, 1.340)  | 0.191          | 0.937 (0.821, 1.070)  | 0.335          | 1.069 (0.895, 1.329)    | 0.551          |
| COVID-19 status                       | Symptomatic                  | 28                                     | 3.250 (0.860, 12.284)  | 0.082          | 193856978.1 (0.000)   | 0.998          | 538491582.8 (0.000)   | 0.998          | 2.000 (0.610, 6.553)  | 0.252          | 269245805.6 (0.000)     | 0.998          |
|                                       | Asymptomatic                 | 19                                     | Reference              |                |                       |                |                       |                |                       |                |                         |                |
| COVID-19 status                       | Active                       | 33                                     | 5.000 (0.964, 25.939)  | 0.055          | 161547490.5 (0.000)   | 0.999          | 43935496.7 (0.000)    | 0.999          | 3.600 (0.970, 13.357) | 0.056          | 222824124.6 (0.000)     | 0.999          |
|                                       | Recover                      | 14                                     | Reference              |                |                       |                |                       |                |                       |                |                         |                |
| COVID-19 status                       | Severe-critical              | 11                                     | 15.750 (2.815, 88.123) | 0.002*         | 605803083.4 (0.000)   | 0.998          | 2827080938 (0.000)    | 0.997          | 2.386 (0.543, 10.476) | 0.249          | 13.125 (1.203, 143.233) | 0.035*         |
|                                       | Asymptomatic, mild, moderate | 36                                     | Reference              |                |                       |                |                       |                |                       |                |                         |                |
| Maternal comorbid                     | 1 comorbid                   | 14                                     | 1.389 (0.327, 5.898)   | 0.656          | 1.538 (0.088, 26.821) | 0.768          | 0.462 (0.043, 4.952)  | 0.523          | 0.800 (0.173, 3.690)  | 0.775          | 0.000 (0.000)           | 0.999          |
|                                       | More than 1 comorbid         | 12                                     | 2.500 (0.572, 10.932)  | 0.224          | 1.818 (0.103, 31.996) | 0.683          | 2.000 (0.334, 11.969) | 0.448          | 5.000 (0.942, 26.530) | 0.059          | 1.900 (0.232, 15.582)   | 0.550          |
|                                       | No comorbid                  | 21                                     | Reference              |                | 0.475                 | 0.915          |                       |                |                       | 0.044          | 0.836                   |                |
| Caesarean section                     | Yes                          | 37                                     | 6.857 (0.786, 59.814)  | 0.081          | 142541891.5 (0.000)   | 0.999          | 376944125.6 (0.000)   | 0.999          | N/A                   | N/A            | 195815142.2 (0.000)     | 0.999          |
|                                       | No                           | 10                                     | Reference              |                |                       |                |                       |                |                       |                |                         |                |
| Placental Histomorphological Features |                              |                                        |                        |                |                       |                |                       |                |                       |                |                         |                |
| MIR                                   | Yes                          | 24                                     | 6.500 (1.679, 25.162)  | 0.007*         | 242321235.8 (0.000)   | 0.998          | 8.118 (0.892, 73.841) | 0.063          | 1.077 (0.339, 3.424)  | 0.900          | 1.048 (0.135, 8.131)    | 0.965          |
|                                       | No                           | 23                                     | Reference              |                |                       |                |                       |                |                       |                |                         |                |
| FIR                                   | Yes                          | 3                                      | 1017150600 (0.000)     | 0.999          | 118205475.4 (0.000)   | 0.999          | 305630381.0 (0.000)   | 0.999          | 2565754162 (0.000)    | 0.999          | 161547505.6 (0.000)     | 0.999          |
|                                       | No                           | 44                                     | Reference              |                |                       |                |                       |                |                       |                |                         |                |

|                                |                       |    |                          |       |                          |       |                           |               |                          |       |                          |       |
|--------------------------------|-----------------------|----|--------------------------|-------|--------------------------|-------|---------------------------|---------------|--------------------------|-------|--------------------------|-------|
| Villitis and Intervillositis   | Yes                   | 12 | 1.369<br>(0.357, 5.245)  | 0.647 | 1.500<br>(0.124, 18.193) | 0.750 | 1.200<br>(0.201, 7.182)   | 0.842         | 1.500<br>(0.401, 5.605)  | 0.547 | 208448366.7<br>(0.000)   | 0.999 |
|                                | No                    | 35 | Reference                |       |                          |       |                           |               |                          |       |                          |       |
| Decidual vasculopathy          | Acute atherosclerosis | 5  | 1.185<br>(0.166, 8.471)  | 0.866 | 0.000 (0.000)            | 0.999 | 0.000 (0.000)             | 0.999         | 6.000<br>(0.582, 61.842) | 0.132 | 0.000 (0.000)            | 0.999 |
|                                | Retention of SM       | 17 | 0.970<br>(0.268, 3.512)  | 0.963 | 0.000 (0.000)            | 0.998 | 0.198<br>(0.022, 1.820)   | 0.152         | 0.818<br>(0.228, 2.933)  | 0.758 | 0.000 (0.000)            | 0.998 |
|                                | No                    | 25 | Reference                |       |                          |       |                           |               |                          |       |                          |       |
| MVT                            | Yes                   | 9  | 1.538<br>(0.352, 6.730)  | 0.567 | 138469271.6<br>(0.000)   | 0.999 | 1.886<br>(0.302, 11.772)  | 0.497         | 3.150<br>(0.578, 17.167) | 0.185 | 1.458<br>(0.134, 15.915) | 0.757 |
|                                | No                    | 38 | Reference                |       |                          |       |                           |               |                          |       |                          |       |
| Accelerated villous maturation | Yes                   | 21 | 2.468<br>(0.730, 8.344)  | 0.146 | 269245816.3<br>(0.000)   | 0.998 | 10.000<br>(1.095, 91.309) | <b>0.041*</b> | 1.393<br>(0.432, 4.490)  | 0.579 | 1.263<br>(0.163, 9.815)  | 0.823 |
|                                | No                    | 26 | Reference                |       |                          |       |                           |               |                          |       |                          |       |
| Avascular villi/FVT            | Yes                   | 3  | 1.143<br>(0.096, 13.617) | 0.916 | 118205478.0<br>(0.000)   | 0.999 | 3.167<br>(0.247, 40.564)  | 0.376         | 1.520<br>(0.128, 18.032) | 0.740 | 6.833<br>(0.473, 98.811) | 0.159 |
|                                | No                    | 44 | Reference                |       |                          |       |                           |               |                          |       |                          |       |
| Chorangiomas                   | Yes                   | 7  | 4.000<br>(0.439, 36.444) | 0.219 | 0.000 (0.000)            | 0.999 | 0.000 (0.000)             | 0.999         | 4.167<br>(0.717, 24.227) | 0.112 | 0.000 (0.000)            | 0.999 |
|                                | No                    | 40 | Reference                |       |                          |       |                           |               |                          |       |                          |       |

**Abbreviations:** CI – confidence interval, FIR – fetal inflammatory response, FVT – fetal vascular thrombosis, OR – odds ratio, MIR – maternal inflammatory response, MVT – maternal vascular thrombosis, N/A – not analysed, SGA – small for gestational age, SM – smooth muscle, \*statistically significant
